# Supplementary material
Source: ML conference proceedings conference paper supplement (https://aclanthology.org/2021.cmcl-1.13)
Supplement: OptionalSupplementaryMaterial [file 2021.cmcl-1.13.OptionalSupplementaryMaterial.zip]

## Appendix

| Name                 | nFix      |      | FFD       |      | GPT       |      | TRT       |      | fixProp    |       |
|----------------------|-----------|------|-----------|------|-----------|------|-----------|------|------------|-------|
| Raw Textual Features |           |      |           |      |           |      |           |      |            |       |
| LENGTH               | 4.30±0.00 | 3.88 | 0.71±0.00 | 0.67 | 2.55±0.00 | 2.21 | 1.69±0.00 | 1.54 | 11.75±0.00 | 11.06 |
| EOS                  | 4.28±0.00 |      | 0.71±0.00 |      | 2.38±0.00 |      | 1.69±0.00 |      | 11.71±0.00 |       |
| SUFFIX               | 4.25±0.00 |      | 0.70±0.00 |      | 2.60±0.00 |      | 1.66±0.00 |      | 11.59±0.00 |       |
| TEXT_ID              | 4.25±0.00 |      | 0.71±0.00 |      | 2.52±0.00 |      | 1.67±0.00 |      | 11.75±0.00 |       |
| PREFIX               | 4.24±0.00 |      | 0.70±0.00 |      | 2.59±0.00 |      | 1.66±0.00 |      | 11.57±0.00 |       |
| SENT_ID              | 4.16±0.00 |      | 0.70±0.00 |      | 2.55±0.00 |      | 1.64±0.00 |      | 11.75±0.00 |       |
| WORD_ID              | 4.11±0.00 |      | 0.70±0.00 |      | 2.52±0.00 |      | 1.61±0.00 |      | 11.52±0.00 |       |
| FORM                 | 4.11±0.00 |      | 0.69±0.00 |      | 2.29±0.00 |      | 1.60±0.00 |      | 11.54±0.00 |       |
| Frequencies          |           |      |           |      |           |      |           |      |            |       |
| FREQUENCY            | 4.30±0.00 | 3.76 | 0.71±0.00 | 0.66 | 2.55±0.00 | 2.13 | 1.69±0.00 | 1.44 | 11.75±0.00 | 10.91 |
| COOC_N               | 4.28±0.00 |      | 0.71±0.00 |      | 2.44±0.00 |      | 1.68±0.00 |      | 11.73±0.00 |       |
| COOC_P               | 4.28±0.00 |      | 0.70±0.00 |      | 2.46±0.00 |      | 1.67±0.00 |      | 11.66±0.00 |       |
| Linguistic Features  |           |      |           |      |           |      |           |      |            |       |
| DEP_LEN              | 4.28±0.00 | 3.69 | 0.71±0.00 | 0.65 | 2.48±0.00 | 2.12 | 1.68±0.00 | 1.43 | 11.73±0.00 | 10.79 |
| MORPHO               | 4.26±0.00 |      | 0.70±0.00 |      | 2.56±0.00 |      | 1.67±0.00 |      | 11.68±0.00 |       |
| POS                  | 4.23±0.00 |      | 0.70±0.00 |      | 2.56±0.00 |      | 1.65±0.00 |      | 11.59±0.00 |       |
| DEPREL               | 4.21±0.00 |      | 0.70±0.00 |      | 2.56±0.00 |      | 1.66±0.00 |      | 11.57±0.00 |       |
| Complexity Metrics   |           |      |           |      |           |      |           |      |            |       |
| ENT_TOK              | 4.32±0.00 | 3.67 | 0.71±0.00 | 0.65 | 2.62±0.00 | 2.12 | 1.69±0.00 | 1.43 | 11.73±0.00 | 10.80 |
| ENT_PARSER           | 4.31±0.00 |      | 0.71±0.00 |      | 2.66±0.00 |      | 1.69±0.00 |      | 11.78±0.00 |       |
| ENT_MORPHO           | 4.31±0.00 |      | 0.71±0.00 |      | 2.62±0.00 |      | 1.69±0.00 |      | 11.77±0.00 |       |
| ENT_MAX              | 4.30±0.00 |      | 0.71±0.00 |      | 2.66±0.00 |      | 1.69±0.00 |      | 11.78±0.00 |       |
| ENT_MEAN             | 4.30±0.00 |      | 0.71±0.00 |      | 2.62±0.00 |      | 1.69±0.00 |      | 11.75±0.00 |       |
| ENT_TAG              | 4.30±0.00 |      | 0.71±0.00 |      | 2.60±0.00 |      | 1.69±0.00 |      | 11.78±0.00 |       |
| STACK_DIST           | 4.23±0.00 |      | 0.70±0.00 |      | 2.50±0.00 |      | 1.67±0.00 |      | 11.63±0.00 |       |
| STACK_SIZE           | 4.20±0.00 |      | 0.70±0.00 |      | 2.48±0.00 |      | 1.65±0.00 |      | 11.59±0.00 |       |

Table 2: Detailed results for individual features and features groups, across 5 metrics.
